# Supplementary material
Source: PubMed Central journal article supplement (PMC5689123)
Supplement: Supp_Table1.pdf [file Supp_Table1.pdf]

## Supplementary Data

SUPPLEMENTARY TABLE S1. OUTPATIENT CHANGES IN WEIGHT, INSULIN DOSE, AND A1C FOR EACH PARTICIPANT

| <i>Participant</i> | <i>Weight (kg)</i> |             | <i>Insulin dose (units)</i> |             | <i>A1c (%)</i> |             |
|--------------------|--------------------|-------------|-----------------------------|-------------|----------------|-------------|
|                    | <i>Control</i>     | <i>CANA</i> | <i>Control</i>              | <i>CANA</i> | <i>Control</i> | <i>CANA</i> |
| 1                  | 74.8               | 75.2        | 52.1                        | 45.6        | 7.3            | 7.3         |
| 2                  | 56.2               | 54.4        | 29.8                        | 27.8        | 7.4            | 7.5         |
| 3                  | 75                 | 73.5        | 38.8                        | 31.0        | 6.6            | 6.4         |
| 4                  | 66.8               | 68.2        | 73.4                        | 61.5        | 7.4            | 7.5         |
| 5                  | 81.5               | 80.4        | 55.8                        | 50.9        | 6.2            | 6.4         |
| 6                  | 61.9               | 61.5        | 40.2                        | 32.8        | 7.2            | 6.7         |
| 7                  | 79.6               | 79.5        | 59.0                        | 53.5        | 8.7            | 8.2         |
| 8                  | 66.4               | 63.6        | 34.7                        | 29.5        | 6.4            | 6.1         |
| 9                  | 81.8               | 81.2        | 55.8                        | 54.8        | 7.5            | 7.2         |
| 10                 | 63.9               | 63.6        | 69.2                        | 40.4        | 7.1            | 6.8         |
| Mean ± SE          | 70.8 ± 2.6         | 70.1 ± 2.7  | 50.9 ± 4.2                  | 42.2 ± 3.5  | 7.2 ± 0.2      | 7.0 ± 0.2   |

Data are presented as mean ± SE.  
CANA, canagliflozin.
